# Supplementary material for: Heteroleptic ruthenium antenna-dye for high-voltage dye-sensitized solar cells
Source: Royal Society of Chemistry journal article supplement (doi:10.1039/c0jm01418d), 2010-01-01
Supplement: c0jm01418d.pdf [file c0jm01418d.pdf]

## Electronic Supplementary Information

# Heteroleptic ruthenium antenna-dye for high-voltage dye-sensitized solar cells

Jheng-Ying Li,<sup>a</sup> Chia-Yuan Chen,<sup>a</sup> Jian-Ging Chen,<sup>b</sup> Chun-Jui Tan,<sup>a</sup> Kun-Mu Lee,<sup>c</sup>  
Shi-Jhang Wu,<sup>a</sup> Yung-Liang Tung,<sup>c</sup> Hui-Hsu Tsai,<sup>\*a</sup> Kuo-Chuan Ho<sup>\*b</sup> and  
Chun-Guey Wu<sup>\*a</sup>

<sup>a</sup> Department of Chemistry, National Central University, Jhong-Li, 32001, Taiwan, ROC.

<sup>b</sup> Department of Chemical Engineering, National Taiwan University, Taipei, 10617, Taiwan, ROC

<sup>c</sup> Photovoltaics Technology Center, Industrial Technology Research Institute, Chutung, Hsinchu, 31040, Taiwan, ROC.

### Supplementary Figure & Table:

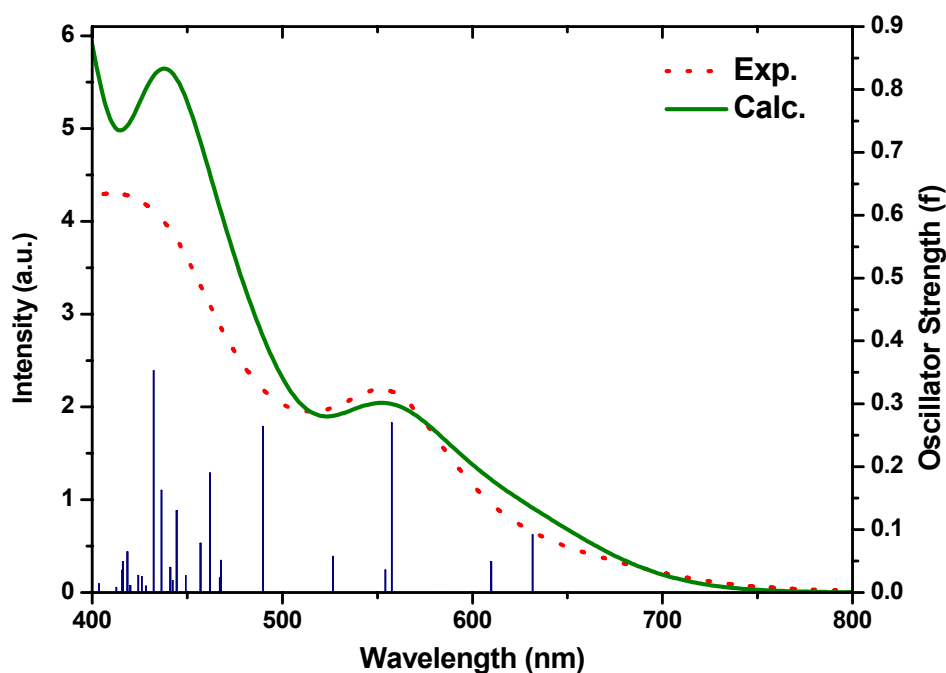

Fig. S1. Comparison between calculated (solid green line) and experimental (dot red line) absorption spectra of **CYC-B7** in DMF. The calculated line spectra (excitation energy and oscillator strengths) are shown in the blue vertical lines. The calculated spectrum was obtained by Gaussian convolution with  $\sigma = 0.15$  eV.

Table S1. Properties of ground-state vertical excitation with the energy lower 3.1 eV and oscillator strengths (*f*) larger than 0.01.

| Transition Energy/nm | Oscillator Strength ( <i>f</i> ) | Transition Assignment (H=HOMO; L=LUMO)             |
|----------------------|----------------------------------|----------------------------------------------------|
| 631.7                | 0.0921                           | H→L (63.5 %), H→L+1 (21.0 %), H-2→L+1 (13.1 %),    |
| 609.84               | 0.0491                           | H→L+1 (58.4 %), H-2→L+1 (19.5 %), H-1→L+1 (12.1 %) |
| 557.58               | 0.2701                           | H-1→L (38.1 %), H-2→L+1 (36.8 %), H-2→L (19.8 %)   |
| 554.27               | 0.0360                           | H-2→L (64.2 %)                                     |
| 526.64               | 0.0578                           | H-2→L+1 (47.7 %)                                   |
| 489.8                | 0.2645                           | H→L+2 (65.2 %), H-2→L+1 (12.0 %)                   |
| 467.74               | 0.0511                           | H-3→L (45.9 %), H-4→L (34.7 %), H-4→L+2 (13.0 %)   |
| 467.15               | 0.0239                           | H-4→L (50.1 %), H-3→L+1 (19.0 %), H-4→L+2 (14.5 %) |
| 461.89               | 0.1900                           | H-1→L+2 (61.9 %), H→L+3 (21.2 %), H-3→L (14.6 %)   |
| 456.97               | 0.0784                           | H→L+3 (62.1 %)                                     |
| 449.16               | 0.0270                           | H-2→L+2 (68.2 %)                                   |
| 444.39               | 0.1306                           | H-5→L (59.2 %), H-3→L+1 (19.1 %), H-2→L+2 (10.8 %) |
| 442.32               | 0.0189                           | H-3→L+1 (53.0 %), H-3→L (36.1 %), H-5→L+1 (14.2 %) |
| 441.05               | 0.0399                           | H→L+4 (49.0 %), H-6→L (29.3 %), H-9→L (28.6%)      |
| 436.49               | 0.1625                           | H→L+4 (41.3 %)                                     |
| 432.28               | 0.3525                           | H-6→L (41.8 %)                                     |
| 428.28               | 0.0101                           | H-1→L+3 (64.4 %)                                   |
| 426.06               | 0.0253                           | H-9→L+1 (42.2 %), H-6→L+1 (28.5 %), H-6→L (23.9 %) |
| 424.23               | 0.0271                           | H-5→L+1 (55.4 %), H-5→L (25.5 %), H-9→L (21.2 %)   |
| 420                  | 0.0113                           | H-2→L+3 (52.8 %), H-6→L+1 (24.4 %)                 |
| 418.5                | 0.0645                           | H-6→L+1 (44.2 %), H-2→L+4 (13.0 %)                 |

|        |        |                                                      |
|--------|--------|------------------------------------------------------|
| 416.11 | 0.0489 | H-3→L+2 (55.7 %), H-6→L+1 (16.6 %)                   |
| 415.77 | 0.0356 | H-4→L+2 (59.5 %), H-3→L+2 (21.8 %), H-4→L+1 (16.3 %) |
| 403.53 | 0.0137 | H-2→L+4 (61.2 %), H-2→L+3 (30.7 %)                   |

Complete Reference 6:

Gaussian 09, Revision A.02, M. J. Frisch, G. W. Trucks, H. B. Schlegel, G. E. Scuseria, M. A. Robb, J. R. Cheeseman, G. Scalmani, V. Barone, B. Mennucci, G. A. Petersson, H. Nakatsuji, M. Caricato, X. Li, H. P. Hratchian, A. F. Izmaylov, J. Bloino, G. Zheng, J. L. Sonnenberg, M. Hada, M. Ehara, K. Toyota, R. Fukuda, J. Hasegawa, M. Ishida, T. Nakajima, Y. Honda, O. Kitao, H. Nakai, T. Vreven, J. A. Montgomery, Jr., J. E. Peralta, F. Ogliaro, M. Bearpark, J. J. Heyd, E. Brothers, K. N. Kudin, V. N. Staroverov, R. Kobayashi, J. Normand, K. Raghavachari, A. Rendell, J. C. Burant, S. S. Iyengar, J. Tomasi, M. Cossi, N. Rega, J. M. Millam, M. Klene, J. E. Knox, J. B. Cross, V. Bakken, C. Adamo, J. Jaramillo, R. Gomperts, R. E. Stratmann, O. Yazyev, A. J. Austin, R. Cammi, C. Pomelli, J. W. Ochterski, R. L. Martin, K. Morokuma, V. G. Zakrzewski, G. A. Voth, P. Salvador, J. J. Dannenberg, S. Dapprich, A. D. Daniels, Ö. Farkas, J. B. Foresman, J. V. Ortiz, J. Cioslowski, and D. J. Fox, Gaussian, Inc., Wallingford CT, 2009.
